# Supplementary material
Source: publisher figshare collection journal article supplement (https://acs.figshare.com/ndownloader/files/13677515)
Supplement: Supplementary file 1 [file 13677515]

## Supporting Information

Authors:

Fan Zhang, Fenyun Yi, Tao Meng, Aimei Gao, Dong Shu, Hongyu Chen,  
Honghong Cheng, Xiaoping Zhou

Manuscript title:

In-Situ Supramolecular Self-Assembly Assisted Synthesis of  
 $\text{Li}_4\text{Ti}_5\text{O}_{12}$ -Carbon-Reduced Graphene Oxide Microspheres for  
Lithium-Ion Batteries

The supporting information includes 11 pages, 8 figures and 2 tables in  
total.

## Supporting Information

### In-Situ Supramolecular Self-Assembly Assisted Synthesis of Li<sub>4</sub>Ti<sub>5</sub>O<sub>12</sub>-Carbon-Reduced Graphene Oxide Microspheres for Lithium-Ion Batteries

Fan Zhang<sup>a</sup>, Fenyun Yi<sup>a\*</sup>, Tao Meng<sup>a</sup>, Aimei Gao<sup>a</sup>, Dong Shu<sup>a,b,c\*</sup>, Hongyu Chen<sup>a</sup>,  
Honghong Cheng<sup>a</sup>, Xiaoping Zhou<sup>a</sup>

<sup>a</sup>. School of Chemistry and Environment, South China Normal University, Guangzhou  
510006, P. R. China

<sup>b</sup>. Guangzhou Key Laboratory of Materials for Energy Conversion and Storage,  
Guangzhou 510006, P. R. China

<sup>c</sup>. Base of Production, Education & Research on Energy Storage and Power Battery of  
Guangdong Higher Education Institutes, Guangzhou 510006, P. R. China

\*Corresponding author. E-mail:

yifenyun@126.com (Fenyun Yi);

dshu@scnu.edu.cn (Dong Shu).

### Material characterization

Powder X-ray diffraction (XRD) measurements were carried out on a Rigaku  
diffractometer by using Cu-K $\alpha$  radiation ( $\lambda=1.5406$  Å). Fourier transform infrared  
spectroscopy (FTIR) was recorded on a Nicolet 5700 FTIR spectrometer. The  
thermogravimetric (TG) measurement was carried out by a TGA Q500 analyzer under  
an air-flow with a heating rate of 8 °C min<sup>-1</sup>. The microstructures of samples were  
investigated by a transmission electron microscope (TEM, JEM-2100). Scanning  
electron microscopy (SEM, JEOL SM-6360LV) was used to observe the morphology  
of the samples. The Raman spectra were collected from LabRAM HR Evolution

1 spectrophotometer (Jobin-Yvon) with a wavelength of 514.5 nm. The pore size  
2 characteristics and Brunauer-Emmett-Teller (BET) specific surface areas of samples  
3 were obtained by N<sub>2</sub> isotherm adsorption/desorption measurements using an  
4 Micromeritics ASAP 2020.

## 5 **Electrochemical measurements**

6 All the electrochemical measurements were carried out using standard coin-cells  
7 (CR 2032) assembled in an argon-filled glovebox. The working electrodes were  
8 prepared as follows. The active material, polyvinylidene fluoride (PVDF), carbon  
9 black were mixed at the mass ratio of 80:10:10 in N-methylpyrrolidone (NMP)  
10 solvent via vigorously stirring to form a uniform slurry. Then, the slurry was coated  
11 on a copper foil and dried under vacuum at 65 °C for 24 h. The typical loading of  
12 active material is about 1.75 mg cm<sup>-2</sup>. The half-cells were assembled using a lithium  
13 foil as the counter electrode and a polypropylene film as the separator. The electrolyte  
14 was 1 mol L<sup>-1</sup> LiPF<sub>6</sub> dissolved in a mixture of ethyl carbonate (EC) and dimethyl  
15 carbonate (DMC) in a volume ratio of 1: 1. Galvanostatical charge-discharge cycles  
16 were carried out on a LAND-CT2001A battery tester at different current densities in  
17 the voltage range of 1.0-2.5 V. The electrochemical impedance spectroscopy (EIS)  
18 and cyclic voltammetry (CV) curves were measured on an electrochemical  
19 workstation (CHI660E). The CV curves were carried out in the potential range of 1.0  
20 to 2.5 V at different scan rates. The EIS were performed in the frequency range of  
21 0.01-100 KHz with an AC signal amplitude of 5 mV.

1

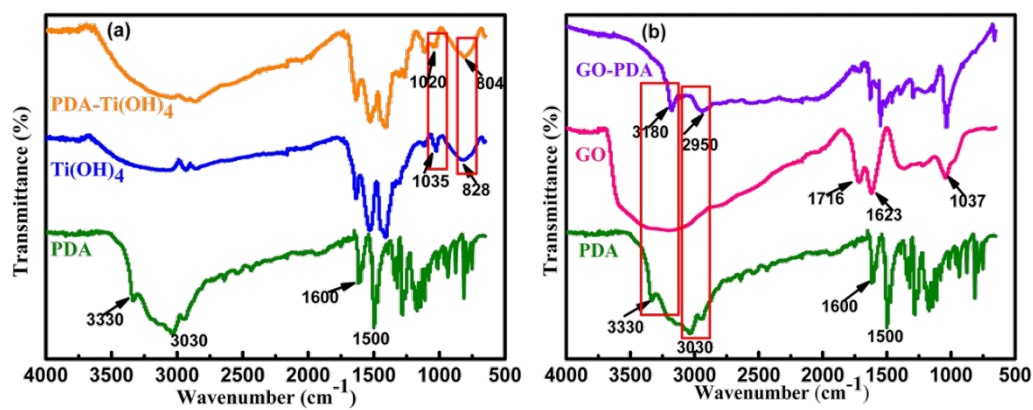

2

3 Fig. S1. FTIR spectra of (a) PDA-Ti(OH)<sub>4</sub>, Ti(OH)<sub>4</sub>, and PDA, (b) GO-PDA, GO, and PDA.

4

5

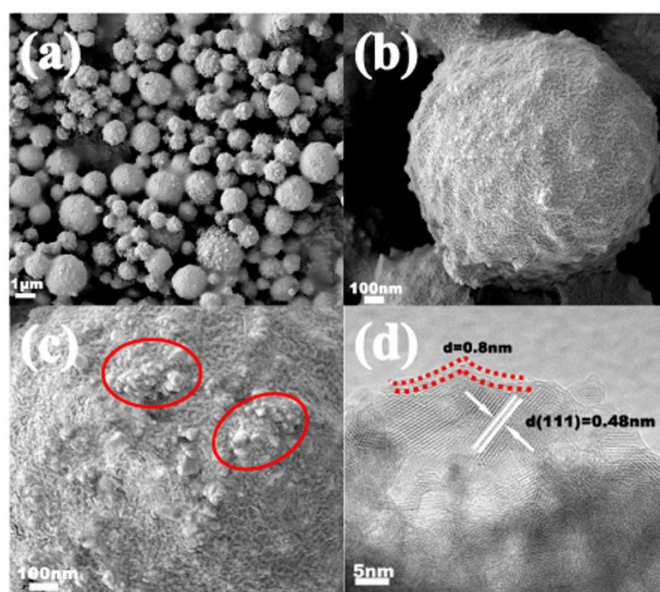

6 Fig. S2 SEM (a),(b),(c) images and HRTEM (d) of LTO-C.

7

8

9

10

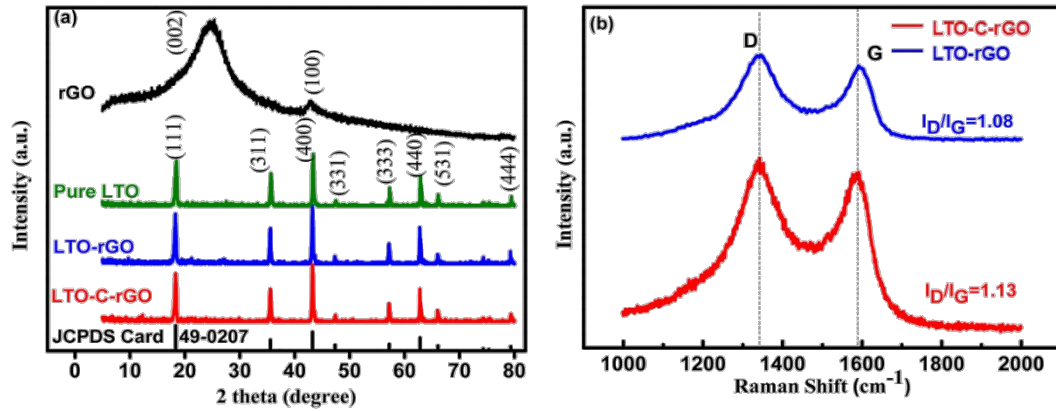

Fig. S3. (a) XRD patterns of rGO, LTO-C-rGO, LTO-rGO, and pure LTO. (b) Raman spectra of LTO-C-rGO and LTO-rGO.

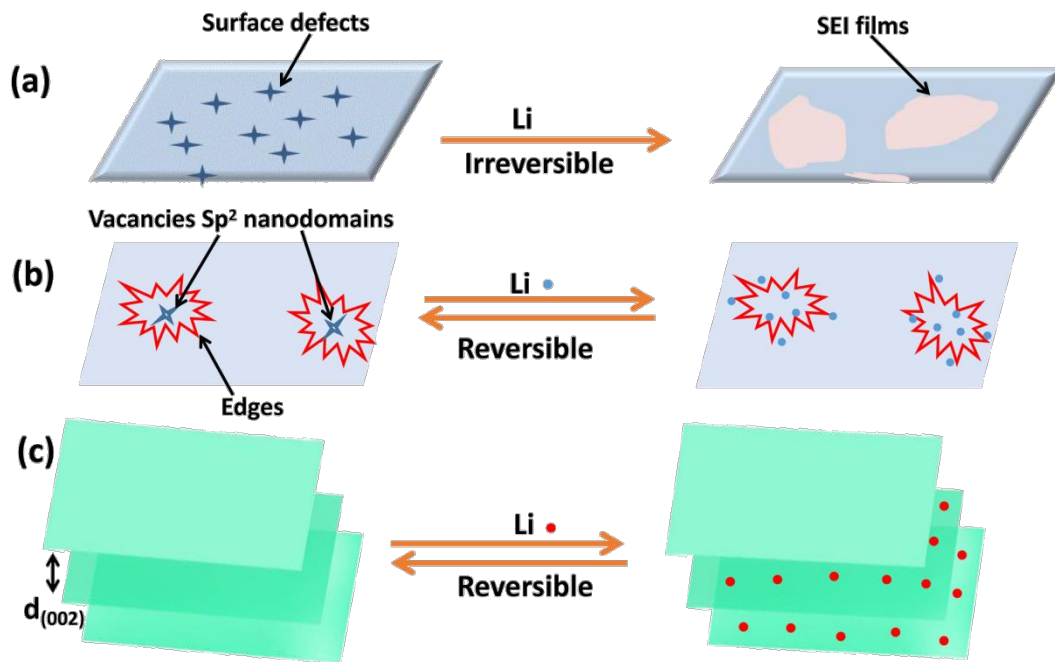

Fig. S4. (a) Irreversible Li storage at the interface between the graphene nanosheets and the electrolyte. (b) Reversible Li storage at the edge sites and the internal defects (e.g., vacancies) of nanodomains embedded in graphene nanosheets; (c) Reversible Li storage between (002) planes.<sup>1-3</sup>

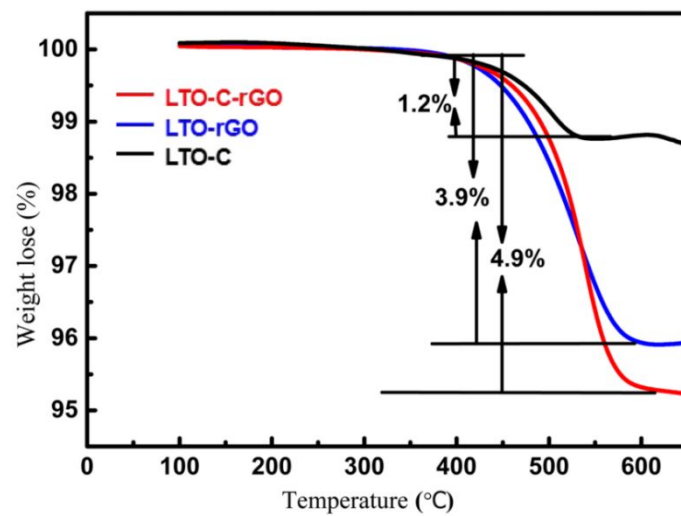

Fig. S5. TG profiles of LTO-C-rGO, LTO-rGO, and LTO-C

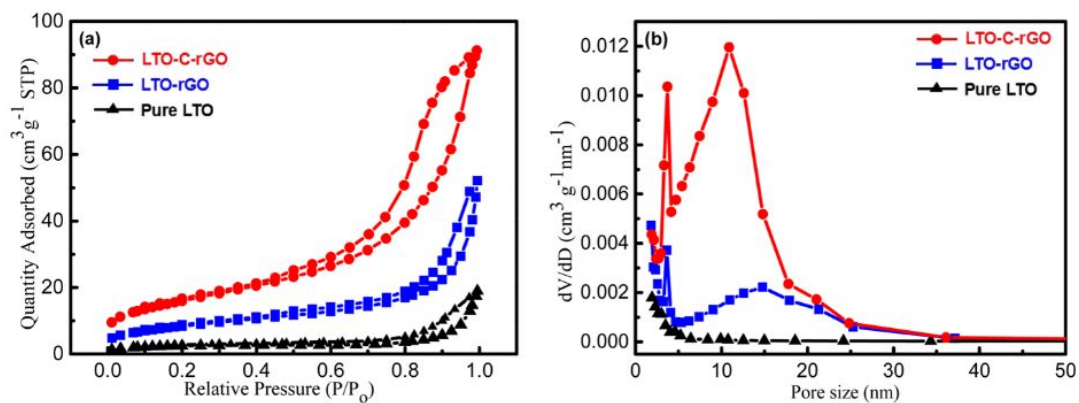

Fig. S6. (a)  $N_2$  adsorption-desorption isotherm and (b) pore size distribution of pure LTO, LTO-rGO, and LTO-C-rGO.

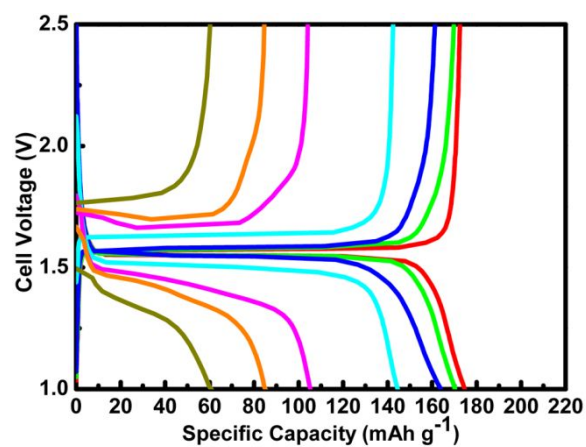

Fig. S7. Discharge/Charge curves of LTO-C electrode at different rates (from right to left): 0.1, 0.5, 1, 3, 5, 10, and 20 C.

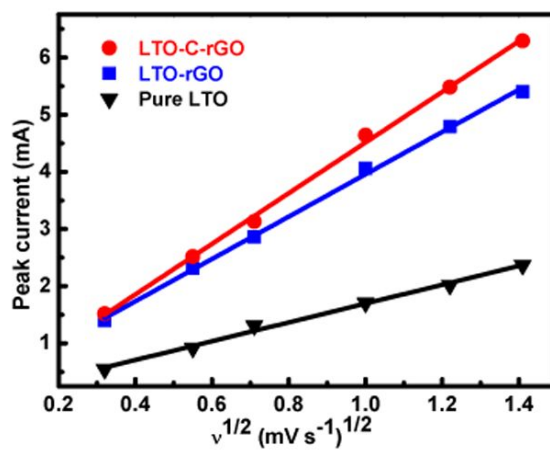

Fig. S8. The relationship plots between peak current and  $v^{1/2}$ .

1 **Specific capacity for the graphene-based composite electrode material:**<sup>4</sup>

2  $C_I = C_L \times \text{LTO wt. \%} + C_G \times \text{G wt. \%}$  (S1)

3 where  $C_I$  is the total specific capacity of the composite,  $C_L$  is the theoretical specific  
4 capacity of LTO, and  $C_G$  is the theoretical specific capacity of graphene. The  
5 theoretical specific capacities of LTO and graphene are 175 and 1100 mAh g<sup>-1</sup>,  
6 respectively.

7

8 **Calculation of Li<sup>+</sup> diffusion coefficient ( $D_0$ ) by CV test results**

9 The peak current ( $i_p$ ) is proportional to the square root of scan rate ( $v^{1/2}$ ), which is  
10 expressed by the Randles-Sevcik equation (S1):<sup>5</sup>

11  $i_p = (2.69 \times 10^5) n^{3/2} A D_0^{1/2} v^{1/2} C_0$  (S2)

12 In this equation,  $n$  is the number of electrons (=1 e<sup>-</sup>) transferred in the Faradaic  
13 reaction,  $A$  is the surface area of the electrode ( $\approx 1.54 \text{ cm}^2$ ),  $D_0$  is the Li<sup>+</sup> ion diffusion  
14 coefficient,  $v$  is the scan rate, and  $C_0$  is the bulk concentration of Li<sup>+</sup> ions in the  
15 electrode ( $\approx 0.15 \text{ mol cm}^{-3}$ ).

16

17

18

19

20

21

22

23

24

25

26

27

28

29

30



Table S1. The performance comparison of the current LTO-C-rGO with previously reported LTO-based anodes:

| Materials                                                                                    | Capacity retention                                      | Rate performance                  | Ref       |
|----------------------------------------------------------------------------------------------|---------------------------------------------------------|-----------------------------------|-----------|
| Li <sub>4</sub> Ti <sub>5</sub> O <sub>12</sub> /graphene (1000:5)                           | about 77% after 500 cycle at 5 C                        | 157 mA h g <sup>-1</sup> at 1 C   | 6         |
| Li <sub>4</sub> Ti <sub>5</sub> O <sub>12</sub> /graphene                                    | 94.8% after 300 cycles at 20 C                          | 171.7 mA h g <sup>-1</sup> at 1 C | 7         |
| Li <sub>4</sub> Ti <sub>5</sub> O <sub>12</sub> /graphene                                    | 89.8% after 100 cycles at 0.5 C                         | 157.6 mA h g <sup>-1</sup> at 1 C | 8         |
| Li <sub>4</sub> Ti <sub>5</sub> O <sub>12</sub> Coated with boron-doped carbon (3%)          | 90% after 200 cycles at 1 C                             | 160 mA h g <sup>-1</sup> at 1 C   | 9         |
| Gd-doped Li <sub>4</sub> Ti <sub>5</sub> O <sub>12</sub>                                     | 88% after 100 cycles at 10 C                            | 150 mA h g <sup>-1</sup> at 1 C   | 10        |
| Li <sub>4</sub> Ti <sub>5</sub> O <sub>12</sub> /rGO                                         | 95.4% after 100 cycles at 10 C                          | 176.6 mA h g <sup>-1</sup> at 1 C | 11        |
| Li <sub>4</sub> Ti <sub>5</sub> O <sub>12</sub> /N-doped rGO                                 | 94.8% after 300 cycles at 10 C                          | 152 mA h g <sup>-1</sup> at 1 C   | 12        |
| Li <sub>2</sub> MoO <sub>4</sub> modified Li <sub>4</sub> Ti <sub>5</sub> O <sub>12</sub> /C | 92.5% after 200 cycles at 10 C                          | 167.5 mA h g <sup>-1</sup> at 1 C | 13        |
| Li <sub>4</sub> Ti <sub>5</sub> O <sub>12</sub> /C/rGO                                       | 94.5% after 500 cycles and 97% after 300 cycles at 20 C | 184 mA h g <sup>-1</sup> at 1 C   | This work |

Table S2. EIS test results of pure LTO, LTO-rGO, and LTO-C-rGO sample

| Samples   | R <sub>s</sub> /Ω | R <sub>ct</sub> /Ω | σ /Ω•cm <sup>2</sup> •s <sup>-1/2</sup> | D/ cm <sup>2</sup> •s <sup>-1</sup> |
|-----------|-------------------|--------------------|-----------------------------------------|-------------------------------------|
| pure LTO  | 11.22             | 31.23              | 27.41                                   | 1.04×10 <sup>-12</sup>              |
| LTO-rGO   | 11.02             | 14.29              | 13.68                                   | 4.17×10 <sup>-12</sup>              |
| LTO-C-rGO | 11.24             | 9.01               | 8.49                                    | 1.08×10 <sup>-11</sup>              |

## Calculation of Li<sup>+</sup> diffusion coefficient (D) by EIS test results

According to the following equation., the diffusion coefficient (D) of Li<sup>+</sup> can be calculated.<sup>13-14</sup>

$$D = \frac{R^2 T^2}{2 A^2 n^4 F^4 C_{Li}^2 \sigma^2} \quad (S3)$$

where  $R$  is the gas constant,  $T$  is the absolute temperature,  $A$  is the surface area of the anode,  $n$  is the number of electrons transferred in the half-reaction for the redox couple of Ti<sup>4+</sup>/Ti<sup>3+</sup>,  $F$  is the Faraday constant,  $C_{Li}$  is the molar concentration of Li<sup>+</sup>,  $\sigma$  is the Warburg factor that can be derived from the following equation:

$$Z_{re} = R_s + R_{ct} + \sigma \omega^{-1/2} \quad (S4)$$

$Z_{re}$  and  $\omega^{-1/2}$  are in a straight line with a slope of  $\sigma$ , using which in equation (S3) the Li<sup>+</sup> diffusion coefficient ( $D$ ) can be obtained.

## Reference

(1) Pan, D.; Wang, S.; Zhao, B.; Wu, M.; Zhang, H.; Wang, Y.; Jiao, Z. Li storage properties of disordered graphene nanosheets. *Chem. Mater.* 2009, 21, 3136-3142.

(2) Menachem, C.; Peled, E.; Burstein, L.; Rosenberg, Y. Characterization of modified NG7 graphite as an improved anode for lithium-ion batteries. *J. power sources* 1997, 68, 277-282.

(3) Winter, M.; Besenhard, J. O.; Spahr, M. E.; Novak, P. Insertion electrode materials for rechargeable lithium batteries. *Adv. Mater.* 1998, 10, 725-763.

(4) Jeong, J. H.; Kim, M.-S.; Kim, Y.-H.; Roh, K. C.; Kim, K.-B. High-rate Li<sub>4</sub>Ti<sub>5</sub>O<sub>12</sub>/N-doped reduced graphene oxide composite using cyanamide both as nanospacer and a nitrogen doping source. *J. Power Sources* 2016, 336, 376-384.

(5) Reyes Jiménez, A.; Klöpsch, R.; Wagner, R.; Rodehorst, U. C.; Kolek, M.;

- 1 Nölle, R.; Winter, M.; Placke, T. A step toward high-energy silicon-based thin film  
2 lithium ion batteries. *ACS nano* 2017, 11, 4731-4744.
- 3 (6) Liu, H.; Wen, G.; Bi, S.; Gao, P. Enhanced rate performance of nanosized  
4  $\text{Li}_4\text{Ti}_5\text{O}_{12}$ /graphene composites as anode material by a solid state-assembly method.  
5 *Electrochim. Acta* 2015, 171, 114-120.
- 6 (7) Shi, Y.; Wen, L.; Li, F.; Cheng, H.-M. Nanosized  $\text{Li}_4\text{Ti}_5\text{O}_{12}$ /graphene hybrid  
7 materials with low polarization for high rate lithium ion batteries. *J. Power Sources*  
8 2011, 196, 8610-8617.
- 9 (8) S.G. Ri, L. Zhan, Y. Wang, L. Zhou, J. Hu, H. Liu,  $\text{Li}_4\text{Ti}_5\text{O}_{12}$ /graphene  
10 nanostructure for lithium storage with high-rate performance. *Electrochim. Acta* 2013,  
11 109, 389-394.
- 12 (9) Su, X.; Huang, T.; Wang, Y.; Yu, A. Synthesis and electrochemical  
13 performance of nano-sized  $\text{Li}_4\text{Ti}_5\text{O}_{12}$  coated with boron-doped carbon. *Electrochim.*  
14 *Acta* 2016, 196, 300-308.
- 15 (10) Zhang, Q.; Verde, M. G.; Seo, J. K.; Li, X.; Meng, Y. S. Structural and  
16 electrochemical properties of Gd-doped  $\text{Li}_4\text{Ti}_5\text{O}_{12}$  as anode material with improved rate  
17 capability for lithium-ion batteries. *J. Power Sources* 2015, 280, 355-362.
- 18 (11) Meng, T.; Yi, F.; Cheng, H.; Hao, J.; Shu, D.; Zhao, S.; He, C.; Song, X.; Zhang,  
19 F. Preparation of lithium titanate/reduced graphene oxide composites with  
20 three-dimensional “fishnet-like” conductive structure via a gas-foaming method for  
21 high-rate lithium-ion batteries. *ACS Appl. Mater. Interfaces* 2017, 9, 42883-42892.
- 22 (12) Leng, K.; Zhang, F.; Zhang, L.; Zhang, T.; Wu, Y.; Lu, Y.; Huang, Y.; Chen, Y.  
23 Graphene-based Li-ion hybrid supercapacitors with ultrahigh performance. *Nano Res.*  
24 2013, 6, 581-592.
- 25 (13) Liu, J.; Lin, Y.; Lu, T.; Du, C.; Wang, W.; Wang, S.; Tang, Z.; Qu, D.; Zhang,  
26 X. Characterization and electrochemical properties of  $\text{Li}_2\text{MoO}_4$  modified  $\text{Li}_4\text{Ti}_5\text{O}_{12}$ /C  
27 anode material for lithium-ion batteries. *Electrochim. Acta* 2015, 170, 202-209.
- 28 (14) Abureden, S.; Hassan, F. M.; Lui, G.; Ahn, W.; Sy, S.; Yu, A.; Chen, Z.  
29 Multigrain electrospun nickel doped lithium titanate nanofibers with high power  
30 lithium ion storage. *J. Mater. Chem. A* 2016, 4, 12638-12647.
